# Supplementary material
Source: PubMed Central journal article supplement (PMC5710277)

## Supplementary Online Content

Sheetz KH, Norton EC, Regenbogen SE, Dimick JB. An instrumental variable analysis comparing Medicare expenditures for laparoscopic vs open colectomy. *JAMA Surg*. Published online June 14, 2017. doi:10.1001/jamasurg.2017.1578

**eFigure.** Conceptual Diagram Illustrating the Relationship Between Instrumental Variables, Treatments and/or Risk Factors, and Outcomes

This supplementary material has been provided by the authors to give readers additional information about their work.

**eFigure.** Conceptual Diagram Illustrating the Relationship Between Instrumental Variables, Treatments and/or Risk Factors, and Outcomes. Here we see that IV's are associated with a particular treatment, for example, but are not directly associated with the outcome in question

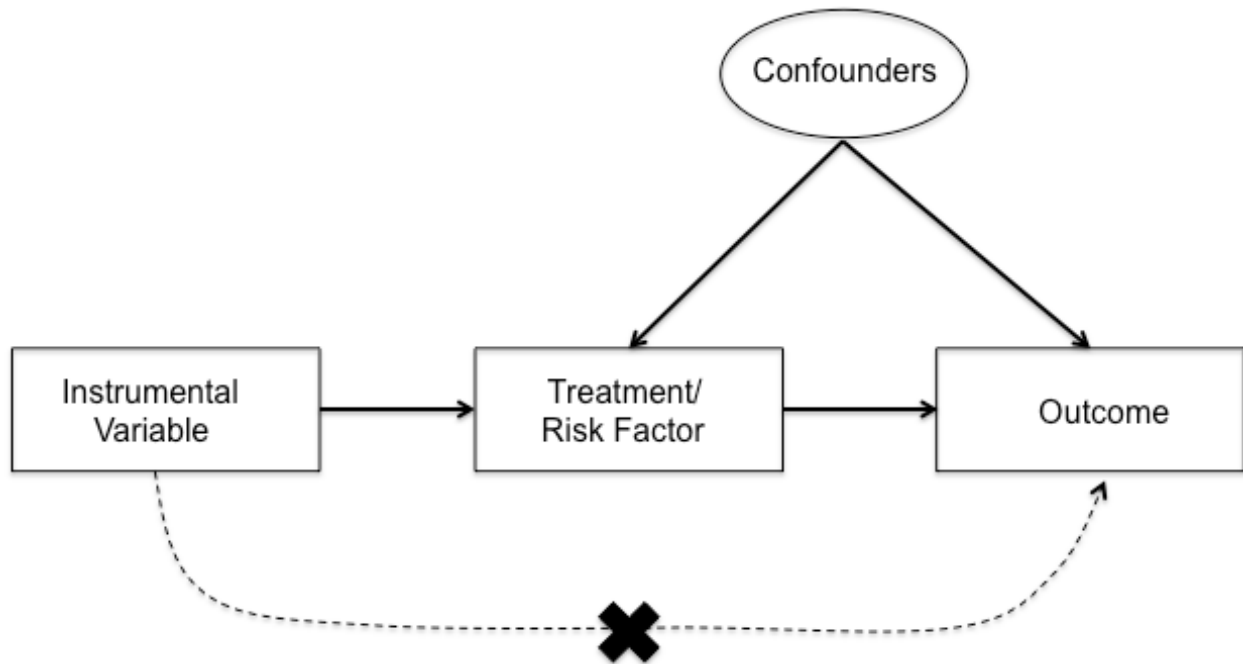

Supplement: jamasurg-152-921-s001.pdf [file jamasurg-152-921-s001.pdf]
